# Supplementary material
Source: Springer Nature journal article supplement (https://www.springermedizin.de/resource/supplementary/10194_2013_583_MOESM3_ESM.pdf/9422714)

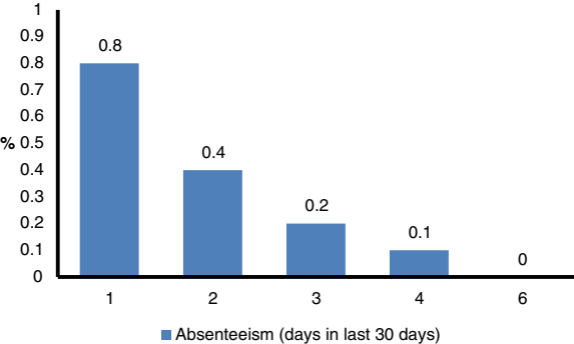

Supplement: MOESM3 [file 9422714]
